# Supplementary material
Source: Research Square preprint supplement (doi:10.21203/rs.3.rs-8510380/v1)
Supplement: Supplementary file 1 [file e47f5d667c9f1a2b231c7613.docx]

**Table S1 The information of clinical strains uesd in this study**

| No. | Species | Strain Name | Source |
| --- | --- | --- | --- |
| 1 | *Staphylococcus aureus* | 2021014 | Isolated from a porcine lung tissue |
| 2 | 2021031 | Isolated from a porcine nasal swab |
| 3 | 2021047 | Isolated from the brain tissue of the pig with neurological symptoms |
| 4 | 2021052 | Isolated from a porcine lung tissue |
| 5 | 2021164 | Isolated from a porcine rectal swab |
| 6 | 2021189 | Isolated from a chicken liver |
| 7 | 2021192 | Isolated from a chicken spleen |
| 8 | *Escherichia coli* | 2021022 | Isolated from a porcine nasal swab |
| 9 | 2021024 | Isolated from a porcine nasal swab |
| 10 | 2021025 | Isolated from a porcine nasal swab |
| 11 | 2021026 | Isolated from a porcine nasal swab |
| 12 | 2021027 | Isolated from a porcine nasal swab |
| 13 | 2021030 | Isolated from a porcine nasal swab |
| 14 | 2021032 | Isolated from a porcine nasal swab |
| 15 | 2021034 | Isolated from a porcine nasal swab |
| 16 | 2021044 | Isolated from the brain tissue of the pig with neurological symptoms |
| 17 | 2021048 | Isolated from the brain tissue of the pig with neurological symptoms |
| 18 | 2021053 | Isolated from a porcine lung tissue |
| 19 | 2021054 | Isolated from a porcine fecal sample |
| 20 | 2021057 | Isolated from the brain tissue of the pig with neurological symptoms |
| 21 | 2021058 | Isolated from the brain tissue of the pig with neurological symptoms |
| 22 | 2021059 | Isolated from the brain tissue of the pig with neurological symptoms |
| 23 | 2021060 | Isolated from the brain tissue of the pig with neurological symptoms |
| 24 | 2021062 | Isolated from a porcine fecal sample |
| 25 | 2021063 | Isolated from a porcine fecal sample |
| 26 | 2021066 | Isolated from a porcine rectal swab |
| 27 | 2021067 | Isolated from a porcine rectal swab |
| 28 | 2021068 | Isolated from a porcine rectal swab |
| 29 | 2021069 | Isolated from a porcine rectal swab |
| 30 | 2021070 | Isolated from a porcine rectal swab |
| 31 | 2021071 | Isolated from a porcine rectal swab |
| 32 | 2021072 | Isolated from a porcine rectal swab |
| 33 | 2021077 | Isolated from a porcine rectal swab |
| 34 | 2021078 | Isolated from a porcine rectal swab |
| 35 | 2021079 | Isolated from a porcine rectal swab |
| 36 | 2021080 | Isolated from a porcine rectal swab |
| 37 | 2021082 | Isolated from a porcine rectal swab |
| 38 | 2021084 | Isolated from a porcine fecal sample |
| 39 | 2021085 | Isolated from a porcine fecal sample |
| 40 | 2021086 | Isolated from a porcine fecal sample |
| 41 | 2021227 | Isolated from a porcine rectal swab |
| 42 | 2021228 | Isolated from a porcine rectal swab |
| 43 | *Salmonella* | ST1 | Isolated from a chicken fecal sample |
| 44 | ST2 | Isolated from a chicken fecal sample |
| 45 | ST3 | Isolated from a chicken fecal sample |
| 46 | ST4 | Isolated from a chicken fecal sample |
| 47 | ST5 | Isolated from a chicken fecal sample |
| 48 | ST6 | Isolated from a chicken fecal sample |
| 49 | ST7 | Isolated from a chicken fecal sample |
| 50 | ST8 | Isolated from a chicken fecal sample |
| 51 | ST9 | Isolated from a chicken fecal sample |
| 52 | ST10 | Isolated from a chicken fecal sample |
| 53 | ST11 | Isolated from a chicken fecal sample |
| 54 | ST12 | Isolated from a chicken fecal sample |
| 55 | *Streptococcus* spp. | 2021015 | Isolated from a porcine lung tissue |
| 56 | 2021019 | Isolated from a porcine lung tissue |
| 57 | 2021162 | Isolated from a porcine rectal swab |
| 58 | 2021220 | Isolated from a porcine fecal sample |
| 59 | 2021221 | Isolated from a porcine fecal sample |
| 60 | 2021223 | Isolated from a porcine fecal sample |
| 61 | 2021224 | Isolated from a porcine fecal sample |
| 62 | 2021226 | Isolated from a porcine fecal sample |
| 63 | 2021232 | Isolated from a porcine fecal sample |
| 64 | 2023001 | Isolated from a porcine lung tissue |
| 65 | 2023002 | Isolated from a porcine lung tissue |

**Table S2 Prediction of secondary metabolite biosynthetic gene clusters in *B.velezensis* BVLY028**

| Region | From | To | Types | Most similar known cluster | Product class | Similarity（%） |
| --- | --- | --- | --- | --- | --- | --- |
| Region 1 | 323,409 | 387,386 | NRPS | surfactin | NRP:Lipopeptide | 86 |
| Region 2 | 924,056 | 965,300 | PKS-like | butirosin A/ butirosin B | Saccharide | 7 |
| Region 3 | 1,050,179 | 1,067,587 | terpene | / | / | / |
| Region 4 | 1,188,577 | 1,217,465 | lanthipeptide-class-ii | / | / | / |
| Region 5 | 1,384,085 | 1,471,920 | transAT-PKS | macrolactin H | Polyketide | 100 |
| Region 6 | 1,691,499 | 1,792,014 | transAT-PKS，T3PKS，NRPS | bacillaene | Polyketide + NRP | 100 |
| Region 7 | 1,865,756 | 2,000,066 | NRPS，transAT-PKS，betalactone | fengycin | NRP | 100 |
| Region 8 | 2,028,704 | 2,050,587 | terpene | / | / | / |
| Region 9 | 2,113,905 | 2,155,005 | T3PKS | / | / | / |
| Region 10 | 2,282,381 | 2,376,173 | transAT-PKS | difficidin | Polyketide + NRP | 100 |
| Region 11 | 3,000,877 | 3,052,665 | NRPS，RiPP-like | bacillibactin | NRP | 100 |
| Region 12 | 3,588,978 | 3,630,396 | other | bacilysin | Other | 100 |


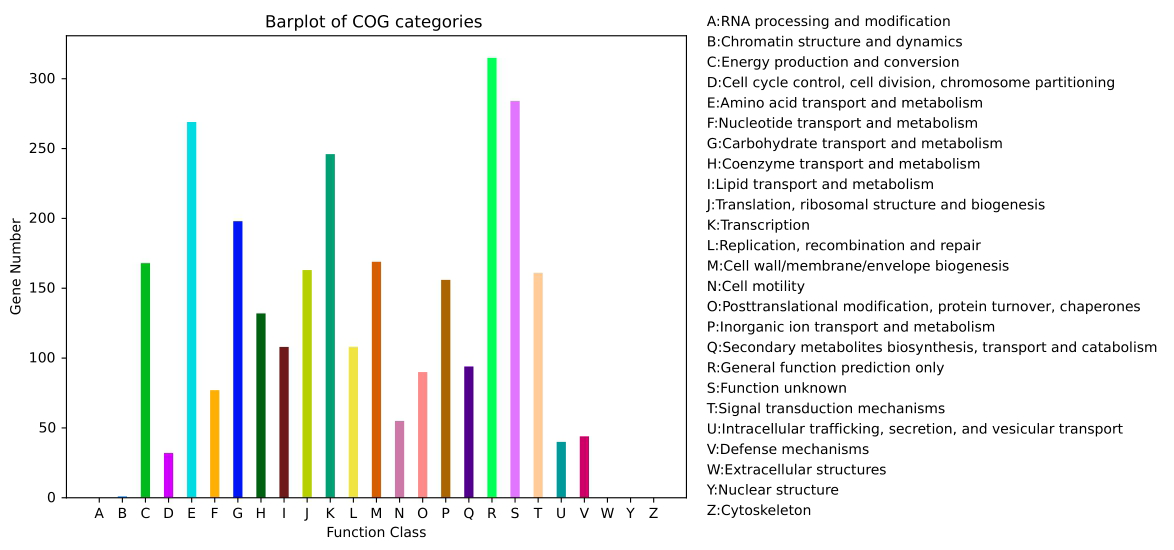


**Fig. S1** Functional annotation of the LYBV028 strain. COG annotation. The x-axis represents COG categories (A–Z), with each category corresponding to a distinct biological function, such as RNA processing, energy production, and signal transduction. The y-axis indicates the number of genes assigned to each category.


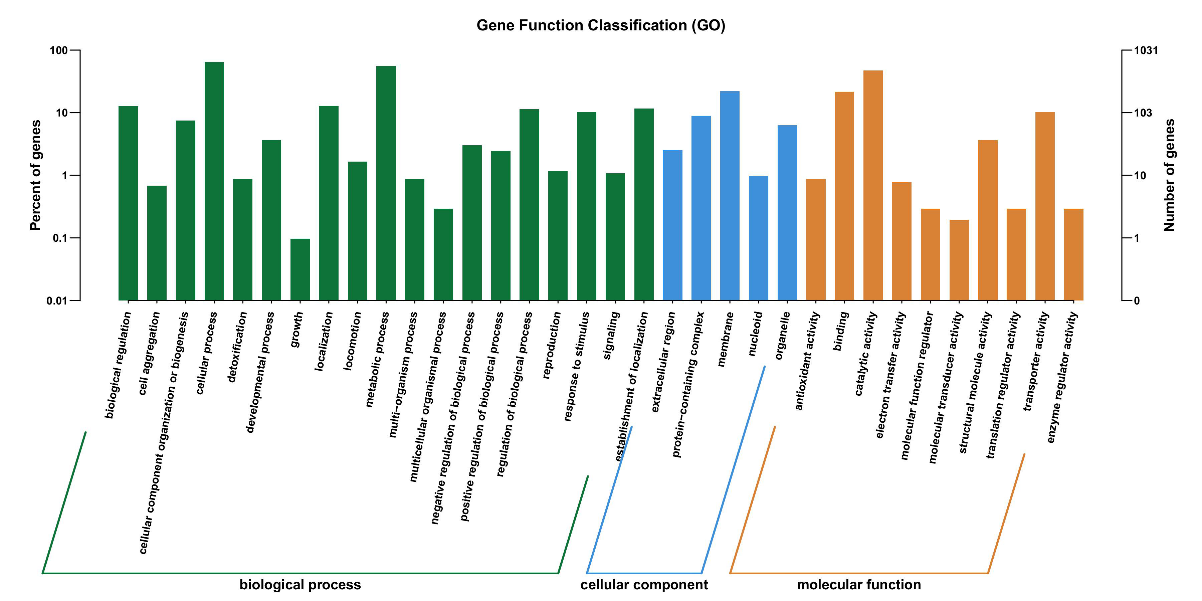


**Fig. S2** Functional annotation of the LYBV028 strain. GO functional annotation. The 20 most significantly enriched GO terms in the biological process, cellular component, and molecular function categories are presented. The y-axis represents the number of genes associated with each GO category, and the x-axis lists the corresponding GO terms.


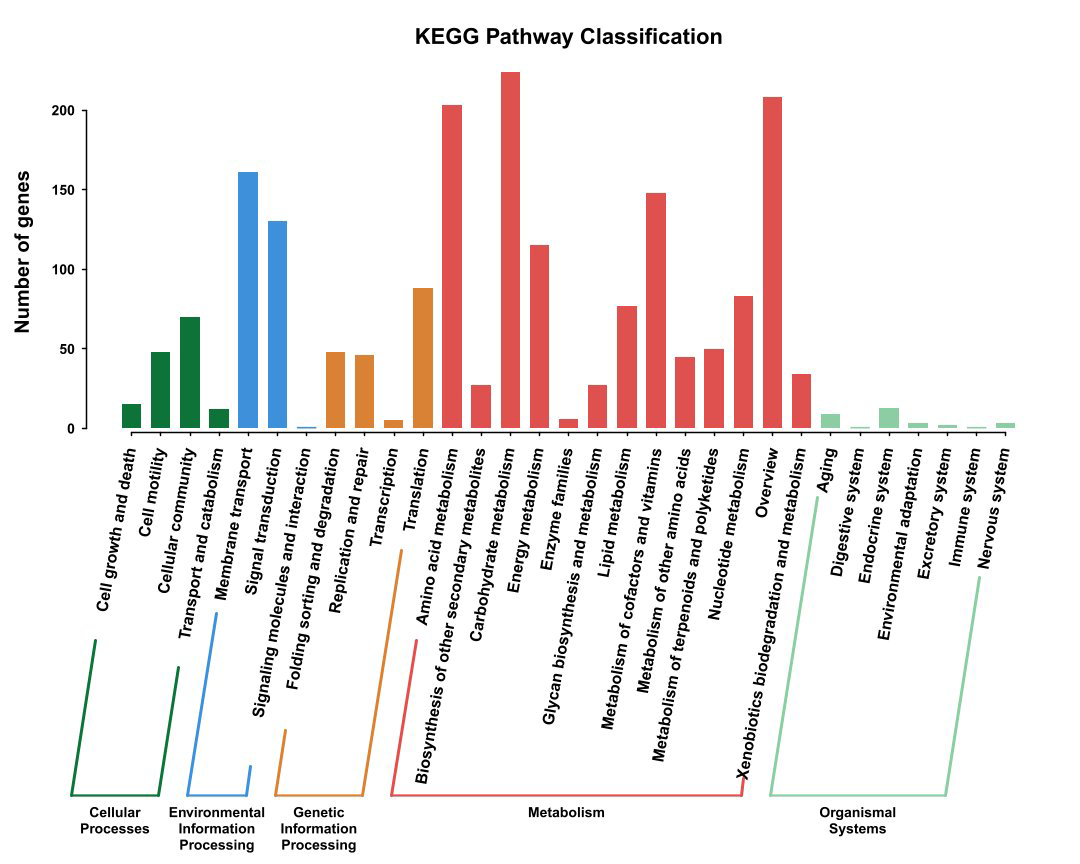


**Fig. S3** Functional annotation of the LYBV028 strain. KEGG pathway annotation. The six most significantly enriched functional categories are displayed on the x-axis, while the y-axis indicates the number of genes assigned to each category. Pathway analysis was performed using the KEGG database (Kanehisa et al., 2025).
